# Supplementary material for: Migration, sexual behaviour, and HIV risk: a general population cohort in rural South Africa
Source: PubMed Central journal article supplement (PMC4533230; doi:10.1016/s2352-3018(15)00045-4), 2015-04-16
Supplement: mmc1.pdf [file mmc1.pdf]

## Supplementary appendix

This appendix formed part of the original submission and has been peer reviewed. We post it as supplied by the authors.

Supplement to: McGrath N, Eaton JW, Newell M-L, Hosegood V. Migration, sexual behaviour, and HIV risk: a general population cohort in rural South Africa. *Lancet HIV* 2015; published online April 17. [http://dx.doi.org/10.1016/S2352-3018\(15\)00045-4](http://dx.doi.org/10.1016/S2352-3018(15)00045-4).

Supplemental table 1: Non-resident eligible population by return visit patterns, for each sex in each year

|                             |                       | Women |      |      |      |      |      |      | Men  |      |      |      |      |      |      |
|-----------------------------|-----------------------|-------|------|------|------|------|------|------|------|------|------|------|------|------|------|
|                             |                       | 2005  | 2006 | 2007 | 2008 | 2009 | 2010 | 2011 | 2005 | 2006 | 2007 | 2008 | 2009 | 2010 | 2011 |
| <b>Among Non-Residents:</b> |                       |       |      |      |      |      |      |      |      |      |      |      |      |      |      |
| <b>Frequent return</b>      | Eligible              | 1227  | 1151 | 1160 | 1019 | 789  | 573  | 701  | 1303 | 1259 | 1245 | 1075 | 775  | 648  | 678  |
|                             | Sampled               | 152   | 189  | 125  | 190  | 186  | 186  | 199  | 145  | 198  | 123  | 188  | 182  | 190  | 199  |
|                             | <i>Sampled %</i>      | 12%   | 16%  | 11%  | 19%  | 24%  | 32%  | 28%  | 11%  | 16%  | 10%  | 17%  | 23%  | 29%  | 29%  |
|                             | <i>Contacted %</i>    | 72%   | 54%  | 58%  | 58%  | 55%  | 56%  | 41%  | 72%  | 46%  | 54%  | 64%  | 50%  | 52%  | 35%  |
|                             | Participated          | 66    | 47   | 30   | 39   | 54   | 41   | 50   | 58   | 42   | 34   | 29   | 42   | 36   | 31   |
|                             | <i>Participated %</i> | 64%   | 46%  | 41%  | 35%  | 52%  | 39%  | 61%  | 59%  | 46%  | 52%  | 24%  | 46%  | 36%  | 44%  |
| <b>Monthly return</b>       | Eligible              | 977   | 879  | 743  | 619  | 541  | 488  | 439  | 1143 | 1065 | 920  | 744  | 651  | 597  | 523  |
|                             | Sampled               | 172   | 181  | 152  | 192  | 185  | 200  | 205  | 169  | 223  | 173  | 195  | 184  | 201  | 205  |
|                             | <i>Sampled %</i>      | 18%   | 21%  | 20%  | 31%  | 34%  | 41%  | 47%  | 15%  | 21%  | 19%  | 26%  | 28%  | 34%  | 39%  |
|                             | <i>Contacted %</i>    | 49%   | 50%  | 43%  | 58%  | 51%  | 46%  | 40%  | 47%  | 37%  | 38%  | 48%  | 46%  | 48%  | 35%  |
|                             | Participated          | 36    | 40   | 40   | 47   | 51   | 48   | 55   | 24   | 39   | 40   | 28   | 41   | 42   | 54   |
|                             | <i>Participated %</i> | 45%   | 44%  | 61%  | 42%  | 54%  | 52%  | 68%  | 32%  | 47%  | 61%  | 30%  | 48%  | 44%  | 76%  |
| <b>Occasional return</b>    | Eligible              | 1457  | 1466 | 1382 | 1247 | 1246 | 993  | 957  | 1754 | 1762 | 1582 | 1396 | 1502 | 1197 | 1071 |
|                             | Sampled               | 152   | 172  | 154  | 173  | 157  | 189  | 196  | 162  | 149  | 167  | 178  | 153  | 191  | 200  |
|                             | <i>Sampled %</i>      | 10%   | 12%  | 11%  | 14%  | 13%  | 19%  | 20%  | 9%   | 8%   | 11%  | 13%  | 10%  | 16%  | 19%  |
|                             | <i>Contacted %</i>    | 52%   | 42%  | 47%  | 58%  | 57%  | 52%  | 37%  | 44%  | 39%  | 43%  | 52%  | 42%  | 49%  | 30%  |
|                             | Participated          | 39    | 35   | 48   | 46   | 47   | 44   | 46   | 23   | 26   | 47   | 34   | 37   | 55   | 48   |
|                             | <i>Participated %</i> | 52%   | 48%  | 66%  | 46%  | 52%  | 44%  | 64%  | 34%  | 45%  | 66%  | 37%  | 57%  | 59%  | 81%  |
| <b>Annual return</b>        | Eligible              | 627   | 558  | 478  | 433  | 422  | 370  | 308  | 1399 | 1317 | 1142 | 1033 | 970  | 857  | 771  |
|                             | Sampled               | 170   | 180  | 174  | 199  | 189  | 195  | 200  | 174  | 176  | 175  | 196  | 184  | 199  | 206  |
|                             | <i>Sampled %</i>      | 27%   | 32%  | 36%  | 46%  | 45%  | 53%  | 65%  | 12%  | 13%  | 15%  | 19%  | 19%  | 23%  | 27%  |
|                             | <i>Contacted %</i>    | 46%   | 39%  | 41%  | 54%  | 49%  | 42%  | 42%  | 49%  | 43%  | 38%  | 43%  | 38%  | 50%  | 33%  |
|                             | Participated          | 35    | 44   | 38   | 51   | 64   | 48   | 61   | 29   | 36   | 42   | 39   | 44   | 52   | 49   |

|                                                                             |                       |      |      |      |      |      |      |      |      |      |      |      |      |      |      |
|-----------------------------------------------------------------------------|-----------------------|------|------|------|------|------|------|------|------|------|------|------|------|------|------|
|                                                                             | <i>Participated %</i> | 46%  | 62%  | 54%  | 48%  | 69%  | 59%  | 73%  | 35%  | 48%  | 64%  | 46%  | 63%  | 53%  | 71%  |
| <b>Other return pattern<sup>1</sup></b>                                     | Eligible              | 2666 | 3278 | 3687 | 4042 | 4381 | 4939 | 5469 | 3379 | 4079 | 4775 | 5349 | 5868 | 6429 | 6885 |
|                                                                             | Sampled               | 165  | 177  | 79   | 178  | 156  | 185  | 201  | 168  | 189  | 88   | 181  | 154  | 191  | 200  |
|                                                                             | <i>Sampled %</i>      | 6%   | 5%   | 2%   | 4%   | 4%   | 4%   | 4%   | 5%   | 5%   | 2%   | 3%   | 3%   | 3%   | 3%   |
|                                                                             | <i>Contacted %</i>    | 46%  | 44%  | 58%  | 57%  | 40%  | 49%  | 42%  | 37%  | 42%  | 34%  | 46%  | 36%  | 40%  | 42%  |
|                                                                             | Participated          | 33   | 41   | 27   | 35   | 32   | 54   | 56   | 26   | 40   | 12   | 15   | 27   | 45   | 63   |
|                                                                             | <i>Participated %</i> | 46%  | 53%  | 59%  | 34%  | 52%  | 59%  | 66%  | 44%  | 51%  | 40%  | 18%  | 49%  | 58%  | 76%  |
| <b>Had a negative HIV test result within surveillance in previous 2 yrs</b> | Eligible              | 512  | 296  | 429  | 687  | 503  | 510  | 531  | 558  | 315  | 511  | 809  | 525  | 561  | 558  |
|                                                                             | <i>Contacted %</i>    | 62%  | 55%  | 51%  | 58%  | 61%  | 55%  | 45%  | 56%  | 50%  | 44%  | 48%  | 57%  | 56%  | 44%  |
|                                                                             | Participated          | 213  | 117  | 147  | 206  | 228  | 177  | 193  | 195  | 101  | 150  | 177  | 215  | 175  | 193  |
|                                                                             | <i>Participated %</i> | 69%  | 72%  | 67%  | 52%  | 74%  | 63%  | 81%  | 64%  | 64%  | 67%  | 46%  | 72%  | 56%  | 78%  |

<sup>1</sup> There is a large group of non-residents whose return patterns are unpredictable or do not fall into the circular migration patterns that were common in the past.
